# Supplementary material
Source: publisher figshare collection journal article supplement (https://acs.figshare.com/ndownloader/files/5200342)
Supplement: Supplementary file 1 [file 5200342]

data_General 
_audit_creation_date                  'Thu Jan 30 08:42:51 2003'
_audit_creation_method                'by teXsan'
_audit_update_record                   ?
#------------------------------------------------------------------------------
# PROCESSING SUMMARY (IUCr Office Use Only) 
_journal_date_recd_electronic          ?
_journal_date_from_coeditor            ?
_journal_date_accepted                 ?
_journal_coeditor_code                 ?
#------------------------------------------------------------------------------
# SUBMISSION DETAILS 
_publ_contact_author_name             ' ENTER NAME'
_publ_contact_author_address
;
    ENTER ADDRESS
;
_publ_contact_author_email            ' ENTER EMAIL ADDRESS '
_publ_contact_author_fax              ' ENTER FAX NUMBER '
_publ_contact_author_phone            ' ENTER PHONE NUMBER '
_publ_contact_letter
;
    ENTER TEXT OF LETTER
;
_publ_requested_journal               test
_publ_requested_category              ' CHOOSE FI FM FO CI CM CO or AD'

_publ_requested_coeditor_name          ?
#------------------------------------------------------------------------------
# TITLE AND AUTHOR LIST 

_publ_section_title
;
    ENTER SECTION TITLE
;

_publ_section_title_footnote
;
    ENTER FOOTNOTE TO TITLE OF PAPER
;
loop_
_publ_author_name
_publ_author_footnote
_publ_author_address
' FIRST AUTHORS NAME '
;
  FIRST AUTHORS FOOTNOTES
;
;
  FIRST AUTHORS ADDRESS
;
_publ_section_synopsis
;
  ENTER SYNOPSIS
;
#------------------------------------------------------------------------------
# TEXT 

_publ_section_abstract
;
    ENTER ABSTRACT
;

_publ_section_comment
;
    ENTER TEXT
;

_publ_section_acknowledgements
;
    ENTER ACKNOWLEDGEMENTS
;

_publ_section_references
;
    ENTER OTHER REFERENCES

Beurskens, P. T., Admiraal, G., Beurskens, G., Bosman, W. P., de Gelder, R.,
Israel, R. & Smits, J. M. M. (1994).  PATTY. The DIRDIF-94 program system, 
Technical Report of the Crystallography Laboratory, University of Nijmegen, 
The Netherlands.

Higashi, T. (1995).  ABSCOR.  Empirical Absorption Correction
based on Fourier Series Approximation.  Rigaku Corporation, 
Tokyo, Japan.

Johnson, C. K. (1976). ORTEP-II. A FORTRAN Thermal-Ellipsoid 
Plot Program. Report ORNL-5138. Oak Ridge National Laboratory.
Tennessee, USA.

MSC & Rigaku. (1999). teXsan. Single Crystal Structure Analysis
Software. Version 1.10.  Molecular Structure Corporation, 
Texsas, USA and Rigaku Corporation, Tokyo, Japan.

Rigaku (1998). PROCESS-AUTO.  Automatic Data Acquisition and Processing
Package for Imaging Plate Diffractometer.  Rigaku Corporation, Tokyo,
Japan

;

_publ_section_figure_captions
;
    ENTER FIGURE CAPTIONS
;

_publ_section_exptl_prep
;
    ENTER COMPOUND PREPARATION DETAILS
;

_publ_section_exptl_refinement
;
    ENTER SPECIAL DETAILS OF THE REFINEMENT
;
#------------------------------------------------------------------------------
# CHEMICAL DATA 
_chemical_formula_sum                  'C18 H30 B F4 I O7 '
_chemical_formula_moiety               'C18 H30 I O7, B F4'
_chemical_formula_weight               572.14
_chemical_melting_point                ?
#------------------------------------------------------------------------------
# CRYSTAL DATA 
_symmetry_cell_setting                 triclinic
_symmetry_space_group_name_H-M        'P -1         '
_symmetry_Int_Tables_number            2
loop_
_symmetry_equiv_pos_as_xyz
x,y,z
-x,-y,-z
_cell_length_a                         9.409(2)
_cell_length_b                         11.449(3)
_cell_length_c                         13.198(3)
_cell_angle_alpha                      119.27(2)
_cell_angle_beta                       112.33(2)
_cell_angle_gamma                      83.36(2)
_cell_volume                           1142.9(5)
_cell_formula_units_Z                  2
_cell_measurement_reflns_used          10898
_cell_measurement_theta_min            3.2
_cell_measurement_theta_max            30.1
_cell_measurement_temperature          93.2
#------------------------------------------------------------------------------
_exptl_crystal_description            'block'
_exptl_crystal_colour                 'colorless'
_exptl_crystal_size_max                0.300
_exptl_crystal_size_mid                0.200
_exptl_crystal_size_min                0.100
_exptl_crystal_size_rad                ?
_exptl_crystal_density_diffrn          1.662
_exptl_crystal_density_meas            ?
_exptl_crystal_density_method         'not measured'
_exptl_crystal_F_000                   576.00
_exptl_absorpt_coefficient_mu          1.470
_exptl_absorpt_correction_type         multi-scan
_exptl_absorpt_process_details        'ABSCOR (Higashi, 1995)'
_exptl_absorpt_correction_T_min        0.585
_exptl_absorpt_correction_T_max        0.863
#------------------------------------------------------------------------------
# EXPERIMENTAL DATA 
_diffrn_radiation_type                'Mo K\a'
_diffrn_radiation_wavelength           0.7107
_diffrn_measurement_device_type       'Rigaku RAXIS-RAPID Imaging Plate'
_diffrn_measurement_method             \w
_diffrn_detector_area_resol_mean       10.00
_diffrn_reflns_number                  11705
_diffrn_reflns_av_R_equivalents        0.024
_diffrn_reflns_theta_max               30.03
_diffrn_measured_fraction_theta_max    0.9637
_diffrn_reflns_theta_full              30.03
_diffrn_measured_fraction_theta_full   0.9637
_diffrn_reflns_limit_h_min             -10
_diffrn_reflns_limit_h_max             13
_diffrn_reflns_limit_k_min             -15
_diffrn_reflns_limit_k_max             16
_diffrn_reflns_limit_l_min             -18
_diffrn_reflns_limit_l_max             18
#------------------------------------------------------------------------------
# REFINEMENT DATA 
_refine_special_details
;
Refinement using reflections with F^2^ > -3.0 sigma(F^2^). The weighted 
R-factor (wR) and goodness of fit (S) are based on F^2^. R-factor (gt) are 
based on F. The threshold expression of F^2^ > 2.0 sigma(F^2^) is used only 
for calculating R-factor (gt).
;
_reflns_number_total                   6428
_reflns_number_gt                      5588
_reflns_threshold_expression           F^2^>2.0\s(F^2^)
_refine_ls_structure_factor_coef       Fsqd
_refine_ls_R_factor_gt                 0.0252
_refine_ls_wR_factor_ref               0.0827
_refine_ls_hydrogen_treatment          ?
_refine_ls_number_reflns               6428
_refine_ls_number_parameters           283
_refine_ls_goodness_of_fit_ref         1.053
_refine_ls_weighting_scheme            calc
_refine_ls_weighting_details
   'w = 1/[\s^2^(Fo^2^) + (0.05000(Max(Fo^2^,0) + 2Fc^2^)/3)^2^]'
_refine_ls_shift/su_max                0.0011
_refine_diff_density_max               1.43
_refine_diff_density_min               -0.82
_refine_ls_extinction_method           none
_refine_ls_extinction_coef             ?
_refine_ls_abs_structure_details       ?
_refine_ls_abs_structure_Flack         ?
loop_
_atom_type_symbol
_atom_type_description
_atom_type_scat_dispersion_real
_atom_type_scat_dispersion_imag
_atom_type_scat_source
  'C' 'C'  0.003 0.002 
;International Tables for Crystallography
(1992, Vol. C, Tables 4.2.6.8 and 6.1.1.1)
;
  'H' 'H'  0.000 0.000 
;International Tables for Crystallography
(1992, Vol. C, Table 6.1.1.2)
;
  'B' 'B'  0.001 0.001 
;International Tables for Crystallography
(1992, Vol. C, Tables 4.2.6.8 and 6.1.1.1)
;
  'F' 'F'  0.017 0.010 
;International Tables for Crystallography
(1992, Vol. C, Tables 4.2.6.8 and 6.1.1.1)
;
  'I' 'I'  -0.474 1.812 
;International Tables for Crystallography
(1992, Vol. C, Tables 4.2.6.8 and 6.1.1.1)
;
  'O' 'O'  0.011 0.006 
;International Tables for Crystallography
(1992, Vol. C, Tables 4.2.6.8 and 6.1.1.1)
;
#------------------------------------------------------------------------------
# ATOMIC COORDINATES AND DISPLACEMENT PARAMETERS 
loop_
_atom_site_label
_atom_site_type_symbol
_atom_site_fract_x
_atom_site_fract_y
_atom_site_fract_z
_atom_site_U_iso_or_equiv
_atom_site_adp_type
_atom_site_occupancy
_atom_site_calc_flag
_atom_site_refinement_flags
_atom_site_disorder_assembly
_atom_site_disorder_group
 I1     I  0.48110(2)  0.59793(2)  0.19016(2)  0.01406(4)  Uani 1.00 d . . .
 F1     F  0.8540(2)   0.0693(2)   0.1436(2)   0.0339(5)   Uani 1.00 d . . .
 F2     F  0.9527(2)   0.2673(2)   0.3230(2)   0.0297(5)   Uani 1.00 d . . .
 F3     F  0.6938(2)   0.2051(2)   0.2373(2)   0.0439(6)   Uani 1.00 d . . .
 F4     F  0.8657(2)   0.0937(2)   0.3283(2)   0.0282(5)   Uani 1.00 d . . .
 O1     O  0.3487(2)   0.5888(2)   0.0322(2)   0.0194(5)   Uani 1.00 d . . .
 O2     O  0.6580(2)   0.5725(2)   0.3834(2)   0.0187(4)   Uani 1.00 d . . .
 O3     O  0.8100(2)   0.6676(2)   0.2804(2)   0.0195(4)   Uani 1.00 d . . .
 O4     O  0.6211(2)   0.8170(2)   0.1687(2)   0.0217(5)   Uani 1.00 d . . .
 O5     O  0.2914(2)   0.8404(2)   0.0970(2)   0.0228(5)   Uani 1.00 d . . .
 O6     O  0.2444(2)   0.8720(2)   0.3146(2)   0.0222(5)   Uani 1.00 d . . .
 O7     O  0.4651(2)   0.7805(2)   0.4775(2)   0.0206(5)   Uani 1.00 d . . .
 C1     C  0.3120(3)   0.4883(2)   0.1855(2)   0.0151(5)   Uani 1.00 d . . .
 C2     C  0.1641(3)   0.5316(3)   0.1637(3)   0.0194(6)   Uani 1.00 d . . .
 C3     C  0.0473(3)   0.4543(3)   0.1511(3)   0.0233(6)   Uani 1.00 d . . .
 C4     C  0.0804(3)   0.3371(3)   0.1603(3)   0.0245(7)   Uani 1.00 d . . .
 C5     C  0.2289(4)   0.2959(3)   0.1811(3)   0.0242(7)   Uani 1.00 d . . .
 C6     C  0.3476(3)   0.3704(3)   0.1930(3)   0.0195(6)   Uani 1.00 d . . .
 C7     C  0.8086(3)   0.5404(3)   0.3769(3)   0.0231(7)   Uani 1.00 d . . .
 C8     C  0.8922(3)   0.6544(3)   0.3894(3)   0.0220(6)   Uani 1.00 d . . .
 C9     C  0.8701(3)   0.7767(3)   0.2807(3)   0.0201(6)   Uani 1.00 d . . .
 C10    C  0.7699(3)   0.7801(3)   0.1630(3)   0.0209(6)   Uani 1.00 d . . .
 C11    C  0.5308(3)   0.8544(3)   0.0763(3)   0.0242(7)   Uani 1.00 d . . .
 C12    C  0.4007(3)   0.9308(3)   0.1120(3)   0.0257(7)   Uani 1.00 d . . .
 C13    C  0.1666(3)   0.9038(3)   0.1362(3)   0.0240(7)   Uani 1.00 d . . .
 C14    C  0.2112(3)   0.9725(3)   0.2760(3)   0.0252(7)   Uani 1.00 d . . .
 C15    C  0.2776(3)   0.9319(3)   0.4458(3)   0.0254(7)   Uani 1.00 d . . .
 C16    C  0.3196(3)   0.8265(3)   0.4856(3)   0.0254(7)   Uani 1.00 d . . .
 C17    C  0.5084(3)   0.6790(3)   0.5132(3)   0.0234(7)   Uani 1.00 d . . .
 C18    C  0.6658(3)   0.6407(3)   0.5103(3)   0.0220(6)   Uani 1.00 d . . .
 B1     B  0.8404(4)   0.1600(3)   0.2587(3)   0.0219(7)   Uani 1.00 d . . .
 H1O    H  0.331(4)    0.656(4)    0.046(4)    0.0239      Uiso 1.00 calc . . .
 H2     H  0.1430      0.6116      0.1576      0.0233      Uiso 1.00 calc . . .
 H3     H  -0.0545     0.4816      0.1362      0.0280      Uiso 1.00 calc . . .
 H4     H  0.0011      0.2853      0.1524      0.0294      Uiso 1.00 calc . . .
 H5     H  0.2501      0.2159      0.1872      0.0291      Uiso 1.00 calc . . .
 H6     H  0.4488      0.3418      0.2057      0.0235      Uiso 1.00 calc . . .
 H7a    H  0.8686      0.5214      0.4426      0.0278      Uiso 1.00 calc . . .
 H7b    H  0.7966      0.4634      0.2985      0.0278      Uiso 1.00 calc . . .
 H8a    H  0.9949      0.6347      0.3950      0.0264      Uiso 1.00 calc . . .
 H8b    H  0.8938      0.7353      0.4622      0.0264      Uiso 1.00 calc . . .
 H9a    H  0.8693      0.8588      0.3515      0.0241      Uiso 1.00 calc . . .
 H9b    H  0.9728      0.7636      0.2833      0.0241      Uiso 1.00 calc . . .
 H10a   H  0.7596      0.6940      0.0927      0.0251      Uiso 1.00 calc . . .
 H10b   H  0.8148      0.8444      0.1556      0.0251      Uiso 1.00 calc . . .
 H11a   H  0.5936      0.9097      0.0719      0.0291      Uiso 1.00 calc . . .
 H11b   H  0.4899      0.7760      -0.0028     0.0291      Uiso 1.00 calc . . .
 H12a   H  0.3512      0.9697      0.0595      0.0308      Uiso 1.00 calc . . .
 H12b   H  0.4405      0.9998      0.1968      0.0308      Uiso 1.00 calc . . .
 H13a   H  0.1335      0.9689      0.1091      0.0288      Uiso 1.00 calc . . .
 H13b   H  0.0841      0.8372      0.0980      0.0288      Uiso 1.00 calc . . .
 H14a   H  0.1285      1.0201      0.2976      0.0302      Uiso 1.00 calc . . .
 H14b   H  0.2999      1.0336      0.3161      0.0302      Uiso 1.00 calc . . .
 H15a   H  0.3613      0.9991      0.4907      0.0304      Uiso 1.00 calc . . .
 H15b   H  0.1893      0.9716      0.4628      0.0304      Uiso 1.00 calc . . .
 H16a   H  0.2425      0.7531      0.4324      0.0305      Uiso 1.00 calc . . .
 H16b   H  0.3267      0.8635      0.5695      0.0305      Uiso 1.00 calc . . .
 H17a   H  0.5109      0.7121      0.5954      0.0281      Uiso 1.00 calc . . .
 H17b   H  0.4358      0.6025      0.4565      0.0281      Uiso 1.00 calc . . .
 H18a   H  0.7019      0.5829      0.5458      0.0264      Uiso 1.00 calc . . .
 H18b   H  0.7349      0.7194      0.5573      0.0264      Uiso 1.00 calc . . .

loop_
_atom_site_aniso_label
_atom_site_aniso_U_11
_atom_site_aniso_U_22
_atom_site_aniso_U_33
_atom_site_aniso_U_12
_atom_site_aniso_U_13
_atom_site_aniso_U_23
 I1     0.01055(8)  0.01564(8)  0.01338(8)  -0.00005(5) 0.00345(5)  0.00554(6) 
 F1     0.037(1)    0.039(1)    0.0221(9)   0.0069(8)   0.0102(8)   0.0131(8)  
 F2     0.0247(9)   0.0279(9)   0.036(1)    -0.0036(7)  0.0037(8)   0.0194(8)  
 F3     0.0196(9)   0.041(1)    0.063(2)    0.0112(8)   0.0119(10)  0.024(1)   
 F4     0.0361(10)  0.0243(9)   0.0321(10)  0.0030(7)   0.0188(8)   0.0147(8)  
 O1     0.0193(9)   0.0201(9)   0.0166(9)   -0.0005(7)  0.0027(7)   0.0095(8)  
 O2     0.0144(8)   0.0214(9)   0.0180(9)   0.0007(7)   0.0030(7)   0.0096(8)  
 O3     0.0133(8)   0.0222(9)   0.0200(9)   -0.0011(7)  0.0030(7)   0.0099(8)  
 O4     0.0148(9)   0.030(1)    0.026(1)    0.0023(7)   0.0068(8)   0.0185(9)  
 O5     0.0187(9)   0.0209(10)  0.029(1)    0.0039(7)   0.0075(8)   0.0134(8)  
 O6     0.0206(9)   0.0203(9)   0.0206(9)   0.0043(7)   0.0076(8)   0.0065(8)  
 O7     0.0134(8)   0.0262(10)  0.0227(9)   0.0009(7)   0.0076(7)   0.0114(8)  
 C1     0.016(1)    0.014(1)    0.012(1)    -0.0007(8)  0.0050(9)   0.0038(9)  
 C2     0.015(1)    0.019(1)    0.020(1)    0.0010(9)   0.0062(10)  0.006(1)   
 C3     0.017(1)    0.026(1)    0.021(1)    -0.0025(10) 0.007(1)    0.006(1)   
 C4     0.024(1)    0.027(1)    0.016(1)    -0.009(1)   0.006(1)    0.004(1)   
 C5     0.028(1)    0.022(1)    0.021(1)    -0.006(1)   0.003(1)    0.012(1)   
 C6     0.018(1)    0.021(1)    0.018(1)    0.0004(9)   0.0036(10)  0.010(1)   
 C7     0.016(1)    0.026(1)    0.027(1)    0.0069(10)  0.005(1)    0.015(1)   
 C8     0.013(1)    0.028(1)    0.020(1)    0.0019(9)   0.0032(10)  0.011(1)   
 C9     0.013(1)    0.021(1)    0.022(1)    -0.0011(9)  0.0063(10)  0.007(1)   
 C10    0.017(1)    0.022(1)    0.026(1)    -0.0008(9)  0.010(1)    0.011(1)   
 C11    0.023(1)    0.030(1)    0.025(1)    0.000(1)    0.007(1)    0.018(1)   
 C12    0.024(1)    0.023(1)    0.031(2)    0.001(1)    0.004(1)    0.018(1)   
 C13    0.018(1)    0.020(1)    0.027(1)    0.0055(10)  0.004(1)    0.010(1)   
 C14    0.020(1)    0.019(1)    0.029(1)    0.0055(10)  0.006(1)    0.009(1)   
 C15    0.016(1)    0.027(1)    0.022(1)    0.0020(10)  0.008(1)    0.002(1)   
 C16    0.014(1)    0.037(2)    0.020(1)    -0.001(1)   0.008(1)    0.009(1)   
 C17    0.022(1)    0.031(1)    0.018(1)    -0.004(1)   0.006(1)    0.013(1)   
 C18    0.020(1)    0.026(1)    0.018(1)    -0.0018(10) 0.0022(10)  0.012(1)   
 B1     0.016(1)    0.021(1)    0.027(2)    0.002(1)    0.006(1)    0.012(1)   
#------------------------------------------------------------------------------
_computing_data_collection            'PROCESS-AUTO (Rigaku, 1998)'
_computing_cell_refinement            'PROCESS-AUTO (Rigaku, 1998)'
_computing_data_reduction             'teXsan (MSC & Rigaku, 1999)'
_computing_structure_solution         'PATTY (Beurskens, 1994)'
_computing_structure_refinement       'teXsan (MSC & Rigaku, 1999)'
_computing_publication_material       'teXsan (MSC & Rigaku, 1999)'
_computing_molecular_graphics         'ORTEP (Johnson, 1976)' 
#------------------------------------------------------------------------------
_geom_special_details
;
 ?
;
loop_
_geom_bond_atom_site_label_1
_geom_bond_atom_site_label_2
_geom_bond_distance
_geom_bond_site_symmetry_1
_geom_bond_site_symmetry_2
_geom_bond_publ_flag
 I1        O1        1.937(2)   . . yes
 I1        C1        2.103(3)   . . yes
 F1        B1        1.406(4)   . . yes
 F2        B1        1.394(4)   . . yes
 F3        B1        1.390(4)   . . yes
 F4        B1        1.397(4)   . . yes
 O1        H1O       0.71(4)    . . no
 O2        C7        1.447(3)   . . yes
 O2        C18       1.435(3)   . . yes
 O3        C8        1.426(3)   . . yes
 O3        C9        1.427(3)   . . yes
 O4        C10       1.434(3)   . . yes
 O4        C11       1.425(3)   . . yes
 O5        C12       1.435(4)   . . yes
 O5        C13       1.439(4)   . . yes
 O6        C14       1.432(4)   . . yes
 O6        C15       1.429(4)   . . yes
 O7        C16       1.433(3)   . . yes
 O7        C17       1.420(4)   . . yes
 C1        C2        1.394(4)   . . yes
 C1        C6        1.394(4)   . . yes
 C2        C3        1.400(4)   . . yes
 C2        H2        0.950      . . no
 C3        C4        1.395(4)   . . yes
 C3        H3        0.950      . . no
 C4        C5        1.391(4)   . . yes
 C4        H4        0.950      . . no
 C5        C6        1.398(4)   . . yes
 C5        H5        0.950      . . no
 C6        H6        0.950      . . no
 C7        C8        1.508(4)   . . yes
 C7        H7a       0.950      . . no
 C7        H7b       0.950      . . no
 C8        H8a       0.950      . . no
 C8        H8b       0.950      . . no
 C9        C10       1.497(4)   . . yes
 C9        H9a       0.950      . . no
 C9        H9b       0.950      . . no
 C10       H10a      0.950      . . no
 C10       H10b      0.950      . . no
 C11       C12       1.508(4)   . . yes
 C11       H11a      0.950      . . no
 C11       H11b      0.950      . . no
 C12       H12a      0.950      . . no
 C12       H12b      0.950      . . no
 C13       C14       1.506(4)   . . yes
 C13       H13a      0.950      . . no
 C13       H13b      0.950      . . no
 C14       H14a      0.950      . . no
 C14       H14b      0.950      . . no
 C15       C16       1.497(5)   . . yes
 C15       H15a      0.950      . . no
 C15       H15b      0.950      . . no
 C16       H16a      0.950      . . no
 C16       H16b      0.950      . . no
 C17       C18       1.505(4)   . . yes
 C17       H17a      0.950      . . no
 C17       H17b      0.950      . . no
 C18       H18a      0.950      . . no
 C18       H18b      0.950      . . no
#------------------------------------------------------------------------------
loop_
_geom_angle_atom_site_label_1
_geom_angle_atom_site_label_2
_geom_angle_atom_site_label_3
_geom_angle
_geom_angle_site_symmetry_1
_geom_angle_site_symmetry_2
_geom_angle_site_symmetry_3
_geom_angle_publ_flag
   O1        I1        C1        91.85(9)   . . . yes
   I1        O1        H1O       106(3)     . . . no
   C7        O2        C18       111.7(2)   . . . yes
   C8        O3        C9        114.2(2)   . . . yes
   C10       O4        C11       112.3(2)   . . . yes
   C12       O5        C13       114.4(2)   . . . yes
   C14       O6        C15       110.3(2)   . . . yes
   C16       O7        C17       111.4(2)   . . . yes
   I1        C1        C2        117.5(2)   . . . yes
   I1        C1        C6        119.5(2)   . . . yes
   C2        C1        C6        122.8(2)   . . . yes
   C1        C2        C3        118.3(3)   . . . yes
   C1        C2        H2        120.8      . . . no
   C3        C2        H2        120.8      . . . no
   C2        C3        C4        120.0(3)   . . . yes
   C2        C3        H3        120.0      . . . no
   C4        C3        H3        120.0      . . . no
   C3        C4        C5        120.3(3)   . . . yes
   C3        C4        H4        119.9      . . . no
   C5        C4        H4        119.8      . . . no
   C4        C5        C6        120.9(3)   . . . yes
   C4        C5        H5        119.5      . . . no
   C6        C5        H5        119.5      . . . no
   C1        C6        C5        117.6(3)   . . . yes
   C1        C6        H6        121.2      . . . no
   C5        C6        H6        121.2      . . . no
   O2        C7        C8        112.1(2)   . . . yes
   O2        C7        H7a       108.8      . . . no
   O2        C7        H7b       108.8      . . . no
   C8        C7        H7a       108.8      . . . no
   C8        C7        H7b       108.8      . . . no
   H7a       C7        H7b       109.5      . . . no
   O3        C8        C7        107.1(2)   . . . yes
   O3        C8        H8a       110.1      . . . no
   O3        C8        H8b       110.1      . . . no
   C7        C8        H8a       110.1      . . . no
   C7        C8        H8b       110.1      . . . no
   H8a       C8        H8b       109.5      . . . no
   O3        C9        C10       108.0(2)   . . . yes
   O3        C9        H9a       109.8      . . . no
   O3        C9        H9b       109.8      . . . no
   C10       C9        H9a       109.8      . . . no
   C10       C9        H9b       109.8      . . . no
   H9a       C9        H9b       109.5      . . . no
   O4        C10       C9        108.7(2)   . . . yes
   O4        C10       H10a      109.7      . . . no
   O4        C10       H10b      109.7      . . . no
   C9        C10       H10a      109.7      . . . no
   C9        C10       H10b      109.7      . . . no
   H10a      C10       H10b      109.5      . . . no
   O4        C11       C12       109.0(2)   . . . yes
   O4        C11       H11a      109.6      . . . no
   O4        C11       H11b      109.6      . . . no
   C12       C11       H11a      109.6      . . . no
   C12       C11       H11b      109.6      . . . no
   H11a      C11       H11b      109.5      . . . no
   O5        C12       C11       109.4(2)   . . . yes
   O5        C12       H12a      109.5      . . . no
   O5        C12       H12b      109.5      . . . no
   C11       C12       H12a      109.5      . . . no
   C11       C12       H12b      109.5      . . . no
   H12a      C12       H12b      109.5      . . . no
   O5        C13       C14       113.0(2)   . . . yes
   O5        C13       H13a      108.6      . . . no
   O5        C13       H13b      108.6      . . . no
   C14       C13       H13a      108.6      . . . no
   C14       C13       H13b      108.6      . . . no
   H13a      C13       H13b      109.5      . . . no
   O6        C14       C13       108.4(2)   . . . yes
   O6        C14       H14a      109.7      . . . no
   O6        C14       H14b      109.7      . . . no
   C13       C14       H14a      109.7      . . . no
   C13       C14       H14b      109.7      . . . no
   H14a      C14       H14b      109.5      . . . no
   O6        C15       C16       109.6(2)   . . . yes
   O6        C15       H15a      109.5      . . . no
   O6        C15       H15b      109.4      . . . no
   C16       C15       H15a      109.5      . . . no
   C16       C15       H15b      109.4      . . . no
   H15a      C15       H15b      109.5      . . . no
   O7        C16       C15       109.6(2)   . . . yes
   O7        C16       H16a      109.4      . . . no
   O7        C16       H16b      109.4      . . . no
   C15       C16       H16a      109.4      . . . no
   C15       C16       H16b      109.4      . . . no
   H16a      C16       H16b      109.5      . . . no
   O7        C17       C18       109.0(2)   . . . yes
   O7        C17       H17a      109.6      . . . no
   O7        C17       H17b      109.6      . . . no
   C18       C17       H17a      109.6      . . . no
   C18       C17       H17b      109.6      . . . no
   H17a      C17       H17b      109.5      . . . no
   O2        C18       C17       109.9(2)   . . . yes
   O2        C18       H18a      109.4      . . . no
   O2        C18       H18b      109.4      . . . no
   C17       C18       H18a      109.4      . . . no
   C17       C18       H18b      109.4      . . . no
   H18a      C18       H18b      109.5      . . . no
   F1        B1        F2        108.6(3)   . . . yes
   F1        B1        F3        109.5(3)   . . . yes
   F1        B1        F4        108.4(2)   . . . yes
   F2        B1        F3        110.6(2)   . . . yes
   F2        B1        F4        109.3(2)   . . . yes
   F3        B1        F4        110.3(3)   . . . yes
#------------------------------------------------------------------------------
loop_
_geom_contact_atom_site_label_1
_geom_contact_atom_site_label_2
_geom_contact_distance
_geom_contact_site_symmetry_1
_geom_contact_site_symmetry_2
_geom_contact_publ_flag
 I1        O2        2.598(2)   . . ?
 I1        O3        2.910(2)   . . ?
 I1        O4        3.137(2)   . . ?
 I1        C7        3.369(3)   . . ?
 I1        O7        3.374(2)   . . ?
 I1        O1        3.520(2)   . 2_665 ?
 I1        O5        3.596(2)   . . ?
 F1        C12       3.313(4)   . 2_665 ?
 F1        C13       3.317(4)   . 1_645 ?
 F1        C14       3.485(4)   . 1_645 ?
 F1        O5        3.551(3)   . 2_665 ?
 F2        C7        3.115(3)   . . ?
 F2        C8        3.179(4)   . 2_766 ?
 F2        C4        3.249(4)   . 1_655 ?
 F2        C7        3.382(4)   . 2_766 ?
 F2        C18       3.383(3)   . 2_766 ?
 F3        C7        3.440(4)   . . ?
 F3        C6        3.570(3)   . . ?
 F4        C10       3.171(3)   . 1_545 ?
 F4        C16       3.255(3)   . 2_666 ?
 F4        O4        3.355(3)   . 1_545 ?
 F4        C9        3.366(3)   . 1_545 ?
 F4        C8        3.456(3)   . 2_766 ?
 F4        C14       3.563(4)   . 1_645 ?
 O1        O5        2.628(3)   . . ?
 O1        O4        3.174(3)   . . ?
 O1        C11       3.352(4)   . . ?
 O1        O1        3.430(4)   . 2_665 ?
 O1        O3        3.515(3)   . 2_665 ?
 O1        C3        3.520(4)   . 2_565 ?
 O1        C12       3.564(4)   . . ?
 O2        C1        3.186(3)   . . ?
 O2        C6        3.240(3)   . . ?
 O3        C3        3.380(4)   . 1_655 ?
 O4        H1O       2.89(4)    . . ?
 O6        C2        3.417(3)   . . ?
 O6        H1O       3.54(4)    . . ?
 O7        C1        3.522(3)   . . ?
 C1        C17       3.537(4)   . . ?
 C3        H1O       3.44(4)    . 2_565 ?
 C3        C8        3.598(4)   . 1_455 ?
 C4        C13       3.513(4)   . 2_565 ?
 C5        C18       3.508(4)   . 2_666 ?
 C11       H1O       2.89(4)    . . ?
 C12       H1O       2.90(4)    . . ?
 C13       H1O       2.99(4)    . . ?
#------------------------------------------------------------------------------
loop_
_geom_hbond_atom_site_label_D
_geom_hbond_atom_site_label_H
_geom_hbond_atom_site_label_A
_geom_hbond_site_symmetry_D
_geom_hbond_site_symmetry_H
_geom_hbond_site_symmetry_A
_geom_hbond_distance_DH
_geom_hbond_distance_HA
_geom_hbond_distance_DA
_geom_hbond_angle_DHA
_geom_hbond_publ_flag
O1       H1O      O4       . . 1_555 0.71(4) 2.89(4) 3.174(3) 107(3) no
O1       H1O      O5       . . 1_555 0.71(4) 1.92(4) 2.627(3) 175(5) no
#------------------------------------------------------------------------------
